# Supplementary material
Source: PubMed Central journal article supplement (PMC3160101)
Supplement: supp_138.18.4075_DEV069146TableS1.pdf [file supp_138.18.4075_DEV069146TableS1.pdf]

**Table S1. Primers used**

| Primer name          | Primer sequence                                                                                      |
|----------------------|------------------------------------------------------------------------------------------------------|
| snail-ra-f           | cgcggatccGATGGAACTTATCCCTGGCTGT                                                                      |
| snail-ra-r           | accttaattaaCAGCGCACTGCAAATTTCTCGT                                                                    |
| snail-la-f           | aggcgcgccGATCCGGTGCAATGATCTTC                                                                        |
| snail-la-r           | cgcggatccTCTGCGTGGCATATACCTTC                                                                        |
| snail-6xgly-gfp-f    | CTCCTGAACAAGCACTCCAGCTCCAAGTGCACCATCACTATTGCGggtggaggcggtgggggtatggtgagcaagggcgagga                  |
| snail-gfp-r          | GCTTAGGTAATTGTGTCCTGCTAAGGGATTCATATGTCGAGAATCtgaagagctattccagaagtagtga                               |
| snailDistal-galk-f   | TTGATATGTTATTTTATTGTTATATATTTTTAAATTTCAACATTTTGCTGcctgttgacaattaatcatcgga                            |
| snailDistal-galk-r   | CAATTTATTAATTTCAACAATTTAACACGGATTATAATTATTAATAATtcagcactgtcctgtcctt                                  |
| snailDistal-del-f    | TTGATATGTTATTTTATTGTTATATATTTTTAAATTTCAACATTTTGCTGATTTTAATAATTATAAATCCGTGTTAAATTGTTTGAAATTTAATAAATTG |
| snailDistal-del-c    | AACTATACAATAAAAATAACAATATATAAAAAATTTAAGGTTGTAACGACTAAAATTATTAATTTAGGCACAATTTAACAACTTTAAATTTAATTAAC   |
| snailProximal-galk-f | AAATCTTAGCTTAAGAAATCTTCTAGAAATTTAATAAGCCTAGCTAAGCTcctgttgacaattaatcatcgga                            |
| snailProximal-galk-r | GTTTCATGGGGTGGTTTCCTCACTTAGATTGAGTGCTTCAAGTACATCTGcagcactgtcctgtcctt                                 |
| snailProximal-del-f  | AAATCTTAGCTTAAGAAATCTTCTAGAAATTTAATAAGCCTAGCTAAGCTGCAGATGTAAGCACTCAATCTAAGTGAGGAAACCACCCATGAAC       |
| snailProximal-del-c  | TTTAGAATCGAATCTTTAGAAGATCTTTAAATTTCCGGATCGATTGCGAGTCTACATGAACCTCGTGAGTTAGATTCACTCCTTTGGTGGGGTACTTG   |
| Snaehswap-f          | AAATCTTAGCTTAAGAAATCTTCTAGAAATTTAATAAGCCTAGCTAAGCTTGATGACACCTTGAACCTG                                |
| Snaehswap-r          | GTTTCATGGGGTGGTTTCCTCACTTAGATTGAGTGCTTCAAGTACATCTGCACAATTAGCTGCCGTTTGC                               |
| Snasquish-galk-f     | ATTTTAATAATTATAAATCCGTGTTAAATTTGTTTGAATTTAATAAATTGcctgttgacaattaatcatcgga                            |
| Snasquish-galk-r     | AGCTTAGCTAGGCTTATTAATTTCTAGAAGATTTCTAAGCTAAGATTcagcactgtcctgtcctt                                    |
| Snasquish-f          | ATTTTAATAATTATAAATCCGTGTTAAATTTGTTTGAATTTAATAAATTGAAATCTTAGCTTAAGAAATCTTCTAGAAATTTAATAAGCCTAGCTAAGCT |
| Snasquish-c          | TAAAATTATTAATTTAGGCACAATTTAACAACTTTAAATTTAACTTTAGAATCGAATCTTTAGAAGATCTTTAAATTTCCGGATCGATTGCA         |
| sna-del2XEbox-galkf  | TGCTAGGTAGCGACGACACGTCGAGTGTTTTCTGTTTTGAAGAAGAAcctgttgacaattaatcatcgga                               |
| sna-del2XEbox-galkr  | ACCCGGAACCTGCGCCTCTGCCGACCGCTGTCGCCATTTGGTGGTGcagcactgtcctgtcctt                                     |
| sna-del2XEbox-f      | TGCTAGGTAGCGACGgAaaCGatCGAGTGTTTTCTGTTTTGAAGAAGAACCACTAAATcGCGACAGCGGCGTCGGCAGAGGCGCAGAGTCCGGGT      |
| sna-del2XEbox-c      | ACGATCCATCGCTGCcttGCTaGCTCACAAAAGACAAAATCTTCTTGGTGGTgATTAgCGCTGTCGCCGAGCCGTCTCCGGCTCTCAAGGCCCA       |
